# Supplementary material for: Presence of the irregular oxidation state of Bi4+ and single-element white emission in YAl3(BO3)4:Bi
Source: Royal Society of Chemistry journal article supplement (doi:10.1039/d2nj03784j), 2022-01-01
Supplement: d2nj03784j1.pdf [file d2nj03784j1.pdf]

## Supporting Information:

### Presence of Irregular Oxidation State of Bi<sup>4+</sup> and Single-Element White Emission in YAl<sub>3</sub>(BO<sub>3</sub>)<sub>4</sub>: Bi

Shuai Yang, ‡,§ Yannan Dai, ‡ Jiwei Tan, ‡ Chungang Duan, ‡,§ Qingbiao Zhao‡

‡ Key Laboratory of Polar Materials and Devices (MOE), Department of Electronic Science, East China Normal University, Shanghai, 200241 China

§ Collaborative Innovation Center of Extreme Optics, Shanxi University, Shanxi 030006, China

§Current affiliation: School of Materials Science and Engineering, Shanghai Jiao Tong University, Shanghai, 200240 China

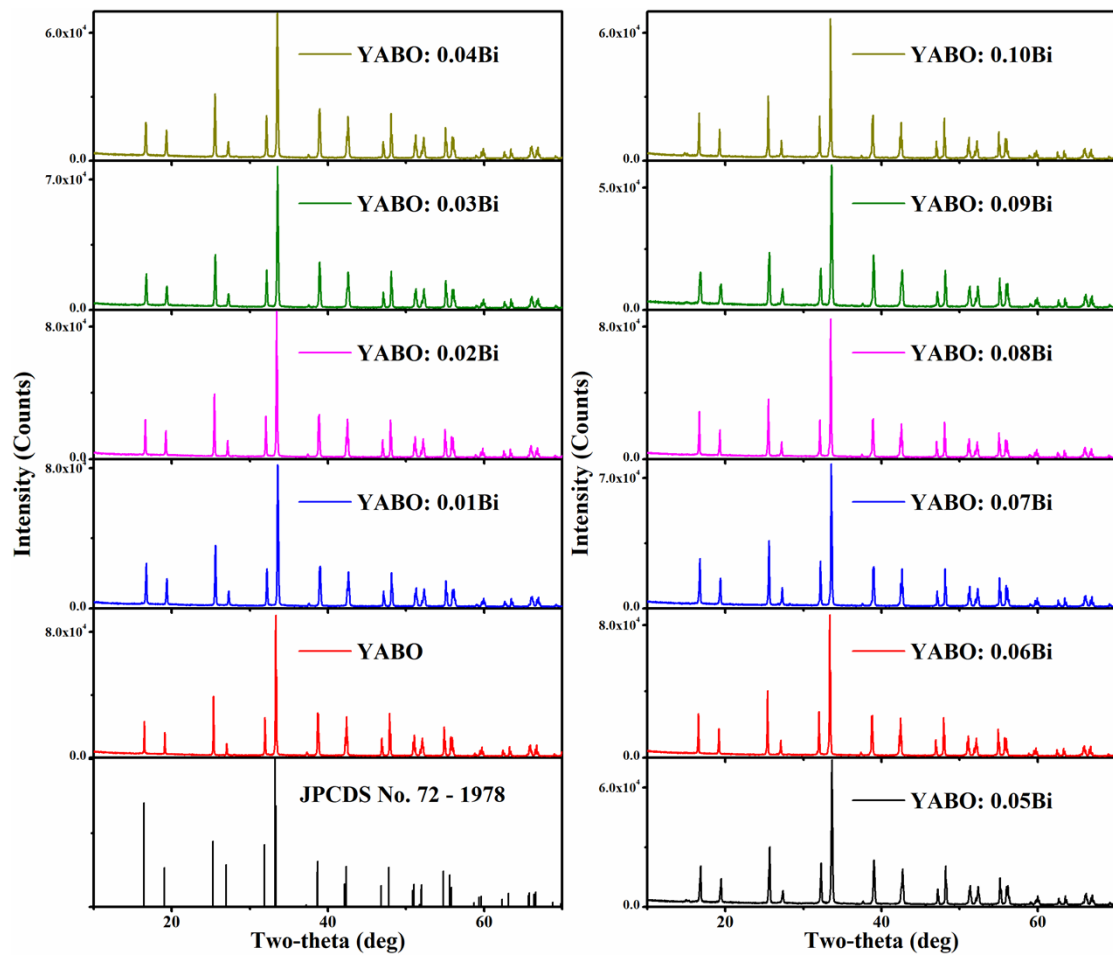

**Figure S1.** The XRD patterns of YABO and YABO: Bi phosphors.

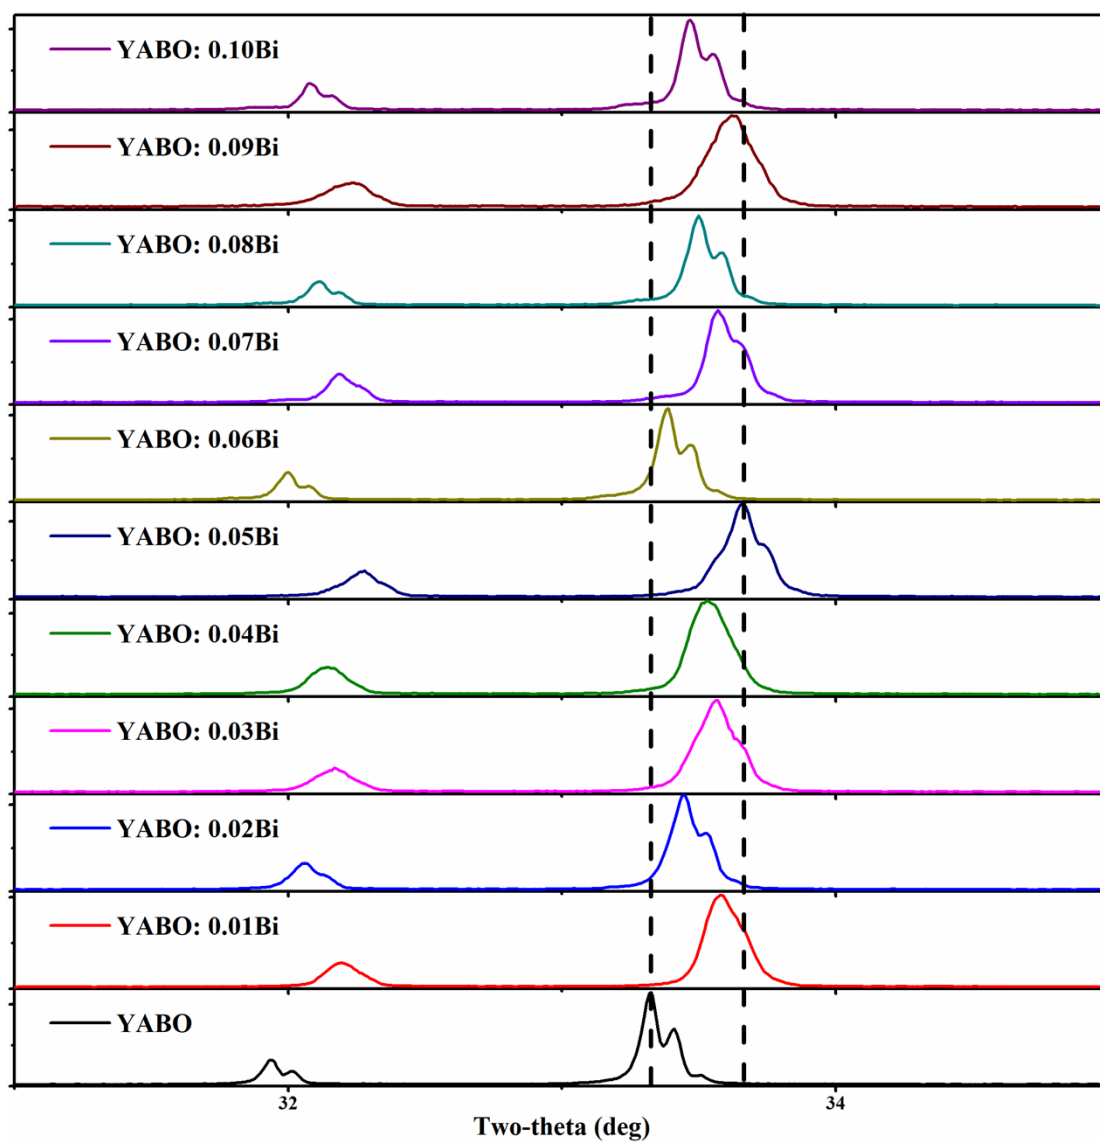

**Figure S2.** The shift of the XRD peaks for various YABO: Bi phosphors in the  $2\theta$  range of  $31\sim 35^\circ$ .

**Table S1.** The lattice parameters and Rietveld refinement parameters for YABO and YABO:0.01Bi

|                     | YABO    | YABO:0.01Bi |
|---------------------|---------|-------------|
| Space group         | $P6_3$  | $P6_3$      |
| a (Å)               | 9.28355 | 9.27495     |
| b (Å)               | 9.28355 | 9.27495     |
| c (Å)               | 7.22959 | 7.22388     |
| V (Å <sup>3</sup> ) | 539.601 | 538.0769    |
| R <sub>wp</sub>     | 9.90 %  | 6.660 %     |
| R <sub>p</sub>      | 7.60 %  | 5.184 %     |
| R <sub>exp</sub>    | 5.897 % | 2.517 %     |
| gof                 | 1.68    | 1.17        |

**Table S2.** Atomic coordinates of YABO obtained by Rietveld refinement

| Atom | x       | y       | z       | occupancy |
|------|---------|---------|---------|-----------|
| Y1   | 0       | 0       | 0       | 1.0       |
| Al1  | 0.55517 | 0       | 0       | 1.0       |
| B1   | 0       | 0       | 0.5     | 1.0       |
| B2   | 0.4317  | 0       | 0.5     | 1.0       |
| O1   | 0.84955 | 0       | 0.5     | 1.0       |
| O2   | 0.58618 | 0       | 0.5     | 1.0       |
| O3   | 0.44504 | 0.14799 | 0.52948 | 1.0       |

**Table S3.** Atomic coordinates of YABO: 0.01Bi obtained by Rietveld refinement

| Atom | x       | y       | z       | occupancy |
|------|---------|---------|---------|-----------|
| Y    | 0       | 0       | 0       | 0.99      |
| Bi   | 0       | 0       | 0       | 0.01      |
| Al   | 0.55528 | 0       | 0       | 1.0       |
| B1   | 0       | 0       | 0.5     | 1.0       |
| B2   | 0.44322 | 0       | 0.5     | 1.0       |
| O1   | 0.85058 | 0       | 0.5     | 1.0       |
| O2   | 0.59066 | 0       | 0.5     | 1.0       |
| O3   | 0.44843 | 0.14899 | 0.52435 | 1.0       |

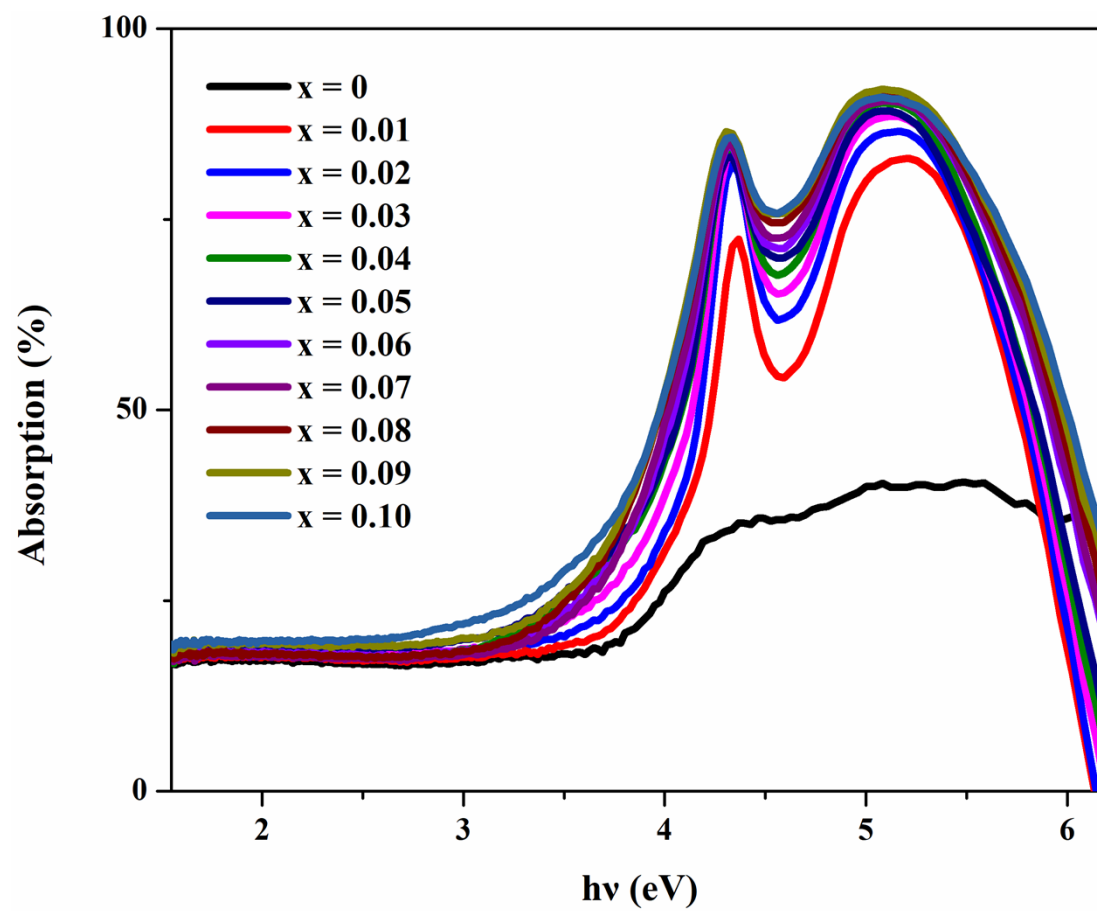

**Figure S3.** The UV-Vis diffuse reflectance spectrum of YABO:Bi phosphors.
